# Supplementary material for: Immanuel Wallerstein: The Modern World-System III. The Second Era of Great Expanson of the Capitalist World-Economy, 1730-1840
Source: Royal Society of Chemistry journal article supplement (doi:10.1039/c9em00550a), 1997-01-01
Supplement: c9em00550a1.pdf [file c9em00550a1.pdf]

Electronic supplementary information

**Effects of NO<sub>2</sub> and SO<sub>2</sub> on the heterogeneous reaction  
of acetic acid on  $\alpha$ -Al<sub>2</sub>O<sub>3</sub> in the presence and absence  
of simulated irradiation**

Ning Yang,<sup>a</sup> Narcisse T. Tsona,<sup>b</sup> Shumin Cheng,<sup>a</sup> Yifeng Wang,<sup>c</sup> Lingyan Wu,<sup>d</sup> Maofa Ge<sup>e</sup> and Lin Du<sup>\*a</sup>

<sup>a</sup> Environment Research Institute, <sup>b</sup> School of Life Science, Shandong University, Binhai Road 72, Qingdao 266237, China

<sup>c</sup> Key Lab for Colloid and Interface Science of Ministry of Education, School of Chemistry and Chemical Engineering, Shandong University, Jinan 250100, China

<sup>d</sup> State Key Laboratory of Severe Weather & Key Laboratory of Atmospheric Chemistry of CMA, Chinese Academy of Meteorological Sciences, 46 Zhong Guan Cun S. Ave., Beijing 100081, China

<sup>e</sup> State Key Laboratory for Structural Chemistry of Unstable and Stable Species, CAS Research/Education Center for Excellence in Molecular Sciences, Institute of Chemistry, Chinese Academy of Sciences, Beijing 100190, China

**Corresponding author:**

Email: lindu@sdu.edu.cn

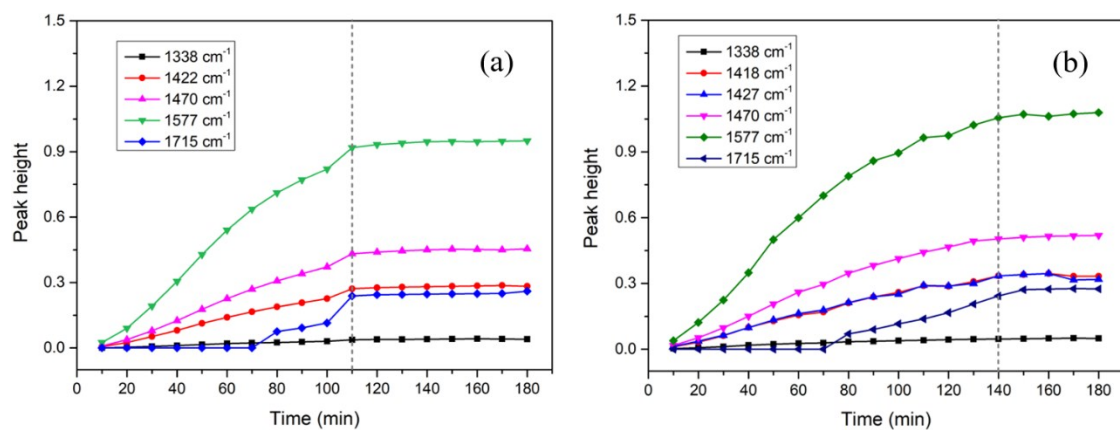

**Fig. S1** Peak heights recorded during the reaction of individual acetic acid on  $\alpha$ -Al<sub>2</sub>O<sub>3</sub> particles: (a) in the dark; (b) in the light.

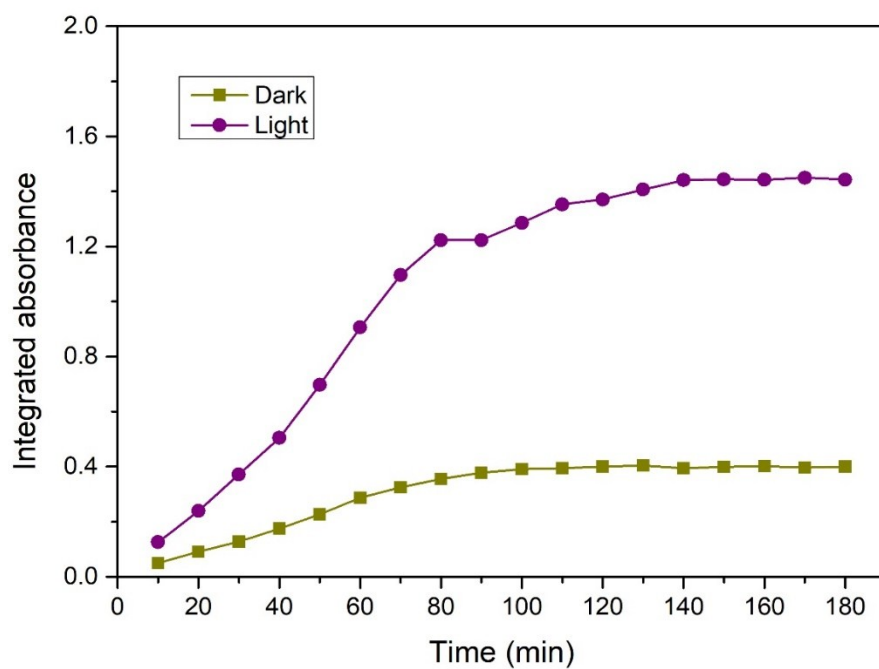

**Fig. S2** Temporal evolution of the integrated absorbance area of nitrate (1400-1760 cm<sup>-1</sup>) for  $\alpha$ -Al<sub>2</sub>O<sub>3</sub> particles exposed to NO<sub>2</sub> alone in the dark or light condition.

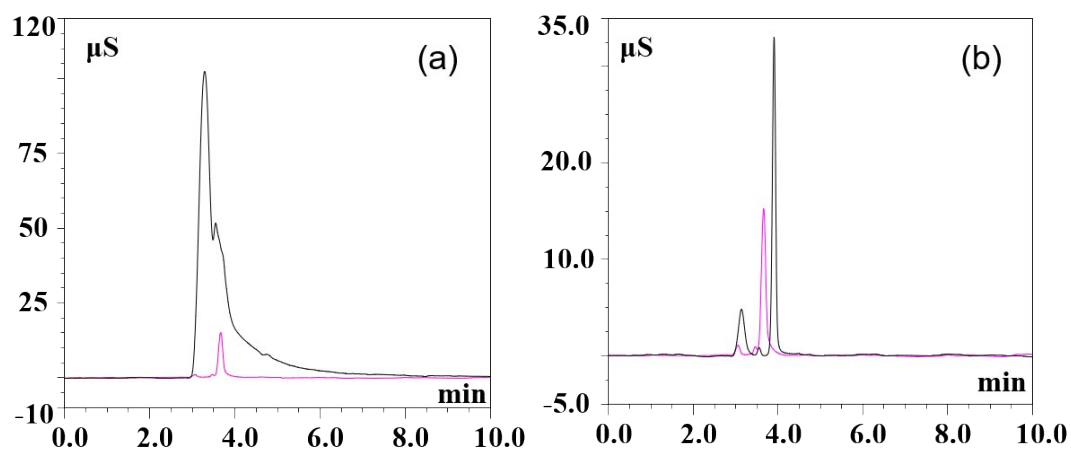

**Fig. S3** IC experimental results recorded after the reaction of individual  $\text{SO}_2$  on  $\alpha\text{-Al}_2\text{O}_3$  particles: (a) the formation of the sulfite in the dark; (b) the formation of the sulfate in the light. The pink curve represents the IC experimental results of the standard sample with a concentration of  $10\text{ }\mu\text{g/L}$  sulfite or sulfate, and the black curve represents the IC experimental results of the products formed in DRIFTS experiments.
